1 **A novel nonsense mutation c.424G>T (p. G142X) in the first exon of**

2 **XLas leading to osteopetrosis**

3 **Short title:** XLas mutation and osteopetrosis

4 Xiang Chen<sup>1</sup>, Ph. D, Yang Meng<sup>1</sup>, Ph. D, Ying Xie<sup>1</sup>, B.S, Shan Wan<sup>1</sup>, M. S., Li Li<sup>2</sup>,

5 B.S, Jie Zhang<sup>3</sup>, B.S, Bo Su<sup>3</sup>, M.S, Xijie Yu<sup>1\*</sup>, Ph. D

6 <sup>1</sup>Laboratory of Endocrinology and Metabolism, Department of Endocrinology, State

7 Key Laboratory of Biotherapy, West China Hospital, Sichuan University, Chengdu,

8 610041, China

9 <sup>2</sup>Laboratory of Pathology, West China Hospital, Sichuan University, Chengdu, 610041,

10 China

11 <sup>3</sup>Core Facility of West China Hospital, Sichuan University, Chengdu, 610041, China

12

13 Corresponding author:

14 Xijie Yu, M.D. & Ph.D.

15 Laboratory of Endocrinology and Metabolism, Department of Endocrinology, State

16 Key Laboratory of Biotherapy, West China Hospital, Sichuan University,

17 No. 37 Guoxue Xiang, Chengdu, China

18 Tel: +86-28-8542-2362,

19 Fax: +86-28-8542-3459,

20 Email: [xijieyu@scu.edu.cn](mailto:xijieyu@scu.edu.cn) or [xijieyu@hotmail.com](mailto:xijieyu@hotmail.com)

21

22

23

## Abstract

24 GNAS is one of the most complex gene loci in the human genome and encodes multiple  
25 gene products. XLas, the extra-large isoform of alpha-subunit of the stimulatory  
26 guanine nucleotide-binding protein (Gas), is paternally inherited. Although XLas can  
27 mimic the action of Gas, its significance remains largely unknown in humans. Here we  
28 report a patient presented with increased bone mass, hypophosphatemia, and elevated  
29 parathyroid hormone levels. His serum calcium was in the lower limit of normal range.  
30 DEXA scan revealed progressive increase in the bone density of this patient. Whole  
31 exome sequencing of this subject found a novel nonsense mutation c.424G>T (p.  
32 G142X) in the first exon of XLas, which was inherited from his father and transmitted  
33 to his daughter. This mutation was predicted to exclusively influence the expression of  
34 XLas, while may have no significant effects on other gene products of this locus. SaOS2  
35 cells transfected with mutant XLas failed to generate cAMP under parathyroid hormone  
36 stimulation, indicating skeletal resistance to this hormone. This subject showed higher  
37 circulating SOST, DKK1 and OPG levels, while lower RANKL levels and  
38 RANKL/OPG ratio, leading to reduced bone resorption. It is speculated that this patient  
39 may belong to a very rare type of pseudohypoparathyroidism with selective skeletal  
40 resistance but normal renal tubular response to parathyroid hormone. Our findings  
41 indicate that XLas plays a critical role in bone metabolism and GNAS locus should be  
42 considered as a candidate gene for high bone mass.

43

44

## Author summary

45 GNAS has been regarded as one of the most complex gene loci and encodes multiple  
46 transcripts, including Gs $\alpha$ , XLas, NESP55 and A/B transcripts. These isoforms share  
47 the same 2-13 exons with alternative first exons. Previously reported mutations often  
48 disrupt multiple protein-coding transcripts in addition to that encoding Gs $\alpha$ , making it  
49 difficult to distinguish the contributions of each transcript to disease phenotypes. Here  
50 we first report a novel nonsense mutation c.424G>T (p. G142X) in the first exon of  
51 XLas in a subject presenting with high bone mass, unclosed cranial suture, and  
52 persistent hypophosphatemia, and elevated parathyroid hormone (PTH) levels. This is  
53 the first report of a mutation located in the first exon of XLas in humans, which was  
54 predicted to exclusively influence the expression of XLas, while may have no  
55 significant effects on other gene products of this locus. SaOS2 cells transfected with  
56 mutant XLas failed to generate cAMP under PTH stimulation, indicating skeletal  
57 resistance to this hormone. Our study suggests that XLas has an important physiological  
58 role in humans, and is involved in skeletal PTH/cAMP pathway. Our findings also  
59 indicate GNAS locus should be considered as a candidate gene for high bone mass.

60

61 **key words:** osteopetrosis; hypophosphatemia; XLas; parathyroid hormone;  
62 pseudohypoparathyroidism

## 63 Funding

64 The National Natural Science Foundation of China.

## 65 Declaration of Interests

66 The authors declare no competing interests.

67

68

69

## Introduction

70 GNAS has been regarded as one of the most complex gene loci in the human genome  
71 and undergoes tissue-specific imprinting [1]. Epigenetic event contributes to tissue  
72 specific imprinting of  $Gs\alpha$ , which leads to phenotypic variability in GNAS mutations.  
73 Heterozygous, maternally inherited inactivating mutations in one of the 13 GNAS  
74 exons encoding  $Gs\alpha$  lead to pseudohypoparathyroidism type 1a (PHP1a). However,  
75 paternal inheritance of the same mutations causes pseudopseudohypoparathyroidism  
76 (PPHP), which manifests as Albright's hereditary osteodystrophy (AHO) without  
77 hormonal resistance [2].

78 The GNAS complex locus encodes multiple transcripts, including  $Gs\alpha$ ,  $XL\alpha s$ ,  
79 NESP55 and A/B transcripts [3]. These isoforms share the common exons 2–13 with  
80 four alternative promoters and first exons [4].  $Gs\alpha$  (NM\_000516.5) couples seven  
81 transmembrane receptors to adenylyl cyclase and is involved in intracellular cAMP  
82 generation [5]. In most tissues,  $Gs\alpha$  is biallelically expressed. However, only maternal  
83 allele of  $Gs\alpha$  is expressed in renal proximal tubules.  $XL\alpha s$  (NM\_080425.3), the extra-  
84 large  $Gs\alpha$  isoform, is paternally expressed [6].  $XL\alpha s$  shows a more restricted tissue  
85 distribution than  $Gs\alpha$ , and is primarily expressed in neuroendocrine tissues. Although  
86  $XL\alpha s$  can mimic the actions of  $Gs\alpha$  to stimulate adenylyl cyclase to generate cAMP,  
87 obviously different cellular actions have been found between  $XL\alpha s$  and  $Gs\alpha$ , possibly  
88 due to their different activation-induced trafficking [6-8]. Presently it is unclear whether  
89  $XL\alpha s$  has an important physiological function in humans. Here we first report a subject  
90 with high bone mass (HBM) carrying a novel mutation in the first exon of  $XL\alpha s$ , which

91 indicats that XLas may play a role in bone metabolism.

## 92 **Materials and Methods**

### 93 **Subjects**

94 This study was approved by the Institutional Review Boards of West China Hospital,  
95 Sichuan University. All subjects were given written, informed consent before  
96 participating in the study. The proband was a 44-year-old man, first seen at the  
97 outpatient unit of West China Hospital in May 2014, with complaints of back pain for  
98 12 years, aggravated with double hip pain for 2 years. The patient's height was 170 cm,  
99 and body weight was 62kg. Laboratory evaluation revealed elevated PTH, low serum  
100 phosphorous and 25-hydroxyvitamin D levels. His serum calcium was at the lower limit  
101 of the normal range. Serum levels of bone specific alkaline phosphatase (BALP), N-  
102 mid osteocalcin (OCN) and type 1 collagen cross-linked C-telopeptide (CTX) were  
103 increased. He had normal thyroid stimulating hormone (TSH) and free T4 (FT4) levels.  
104 His mean bone mineral density, T and Z scores of lumbar vertebrae, L1–L4, were 1.936  
105 (gm/cm<sup>2</sup>), 7.1 and 7.6, respectively. His mean bone mineral density, T and Z scores of  
106 femoral neck were 1.406 (gm/cm<sup>2</sup>), 3.3 and 3.8, respectively (table 1). This patient had  
107 no history of fluorosis and hepatitis C infection.

### 108 **Circulating SOST, DKK1, receptor activator of RANKL and OPG levels**

109 Plasma levels of SOST, RANKL and OPG were detected using kits from abcam  
110 (Cambridge, UK). Serum DKK1 levels were also measured using ELISA methods  
111 (R&D Systems, Inc., Minneapolis, USA). Twenty gender- and age- matched healthy  
112 adult males were selected as controls.

### 113 **Mutation analysis**

114 WES of the proband was performed and the detected possible mutations were further  
115 analyzed in DNA samples from his parents, brother and children (KingMed Diagnostics,  
116 Guangzhou, China).

### 117 **Osteoclast culture**

118 Osteoclasts from human peripheral blood were cultured as previously described <sup>10</sup>.  
119 PBMCs were isolated using Ficoll-Hypaque Solution. Cells were washed in PBS twice,  
120 and plated on 24-well plates at a density of  $1 \times 10^6$ /well at 37°C in  $\alpha$ -MEM,  
121 supplemented with 10% FBS, 1% penicillin/streptomycin and 25 ng/ml of macrophage  
122 colony stimulating factor (M-CSF) (R&D Systems, Inc., Minneapolis, USA). 6 days  
123 later, OC differentiation was induced with the medium supplemented with both  
124 25ng/ml of M-CSF and 30ng/ml RANKL (R&D Systems, Inc., Minneapolis, USA). 7  
125 days later, TRAP staining was performed using a kit from Sigma-Aldrich (sigma  
126 Chemical Co., St. Louis, MO, USA). TRAP-positive cells containing 3 or more nuclei  
127 were counted as OCs. 6mm\*6mm bovine cortical bone slices were put into cell culture  
128 wells at the beginning of OC differentiation. 7 days after co-cultures, the slices were  
129 removed and evaluated for OC morphology and pit formation by scanning electron  
130 microscope (INCA PENTAFET X3, Oxford Instruments, Abingdon, Oxfordshire, UK).

### 131 **Plasmids**

132 WT XLas cDNA was synthesized according to the sequence from Genebank database,  
133 and the mutant XLas cDNA was generated by site-directed mutant PCR and was  
134 confirmed by sequencing. The WT and mutant XLas cDNAs, tagged with enhanced

135 green fluorescent protein (EGFP), were cloned into expression vector GV144  
136 (Shanghai Genechem Co., Ltd., Shanghai, China).

### 137 **Expression and location of WT and Mutant XLas in SaOS2 cells**

138 Human SaOS2 cells were maintained in  $\alpha$ MEM containing 10 % FBS, 10 mM HEPES,  
139 0.2 M L-Glutamine and penicillin/gentamycin at 37 °C with 5 % CO<sub>2</sub>. After reaching  
140 70–80% confluence, cells were transfected with 1.5ug DNA per well with 1:3 ratio of  
141 Xtreme<sup>HP</sup> transfection reagent (Roche Diagnostics Ltd., Indianapolis, USA). 72h after  
142 transfection, cells were fixed in 4% PBS-buffered paraformaldehyde at room  
143 temperature for 5min. Cell nuclei were dyed with DAPI.

144 72h after transfection, the growth medium was aspirated and the total RNA was  
145 extracted using a Trizol reagent (Thermo Fisher Scientific Inc., Waltham, USA).  
146 Relative gene expression levels were normalized to GAPDH, and analyzed with 2<sup>- $\Delta\Delta$ Ct</sup>  
147 method.

### 148 **cAMP production stimulated by PTH**

149 72h after transfection, the confluent monolayer SaOS2 cells were serum starved for 6  
150 hours prior to treatment. Cells were first treated with 3-isobutyl-1-methylxanthine  
151 (IBMX, 1mM) (R&D Systems, Inc., Minneapolis, USA) for 15min and then treated  
152 with PTH(1-34) (50 nM) (R&D Systems, Inc., Minneapolis, USA) for 20 min. Cells  
153 were lysed using 0.1M HCL and cAMP levels were measured using a direct cAMP  
154 ELISA kit (Sigma Chemical Co., St. Louis, MO, USA).

155

156

## **Results**



## 157 **Clinical and laboratory findings**

158 The proband was prescribed caltrate plus vitamin D<sub>3</sub> to exclude the secondary  
159 hyperparathyroidism induced by vitamin D deficiency. The serum levels of 25-  
160 hydroxyvitamin D<sub>3</sub> were reversed within the normal range, however, elevated PTH and  
161 hypophosphatemia persisted and his serum calcium levels remained at the lower limit  
162 of the normal range. It could be seen from table 1 that the levels of B-ALP, OCN and  
163 CTX showed a tendency to decrease during the past 4 years. He had low TRP (%)  
164 (percent tubular reabsorption of phosphate) and TmPO<sub>4</sub>/GFR (tubular maximum  
165 phosphate reabsorption per glomerular filtration rate) (table 1), indicating reduced  
166 tubular reabsorption of phosphorus. Compared with the other members of his family,  
167 the proband showed lower Fractional Excretion of Calcium (FECa) (table 1), indicating  
168 low urinary calcium excretion. The DXA scan performed in February 2017 and October  
169 2018 revealed progression in the bone density of the proband (table 1). X-ray of skull  
170 showed unclosed coronal suture and sagittal suture. Diffuse increase in bone mass was  
171 seen in the vertebral body. Pelvic X-ray showed bilateral femoral neck fractures and  
172 uneven bone density in pelvic. Cortical bone thickening was seen in long bones  
173 (Fig.1A-D). His father had a history of fracture and was unable to walk for 5 years for  
174 unknown reasons. The proband or his family members did not show heterotopic  
175 ossifications in their skeletons.

176 Compared with the normal controls, this subject showed significantly higher SOST,  
177 OPG, and DKK1 levels, while lower RANKL levels and decreased RANKL/OPG ratio  
178 (table 1). His father also had higher SOST and OPG levels, as well as lower RANKL

179 levels and decreased RANKL/OPG ratio (table 1).

180

181 **Table 1. Clinical and Biochemical Results**

|                                              | Proband                   |           |             |            | Father | Mother | Daughter | Son  | Brother   | Reference<br>Range |
|----------------------------------------------|---------------------------|-----------|-------------|------------|--------|--------|----------|------|-----------|--------------------|
|                                              | 2014-3-6 <sup>&amp;</sup> | 2017-2-20 | 2018-10-31* | 2018-11-19 |        |        |          |      |           |                    |
| <b>Age (y)</b>                               | 44                        | 47        | 48          | 48         | 84     | 70     | 12       | 10   | 45        | N/A                |
| <b>Bone fractures</b>                        | Yes                       | Yes       | Yes         | Yes        | Yes    | No     | No       | No   | No        | N/A                |
| <b>BMD (L1–L4)(gm/cm<sup>2</sup>)</b>        | 1.936                     | 2.217     | 2.368       | N/A        | N/A    | N/A    | N/A      | N/A  | 0.979     | N/A                |
| <b>T /Z values of L1-L4</b>                  | 7.1/7.6                   | 9.5/9.9   | 10.7/11.3   | N/A        | N/A    | N/A    | N/A      | N/A  | -0.9/-0.5 | N/A                |
| <b>BMD (femoral neck)(gm/cm<sup>2</sup>)</b> | 1.406                     | 1.594     | 1.637       | N/A        | N/A    | N/A    | N/A      | N/A  | 0.769     | N/A                |
| <b>T /Z values of femoral neck</b>           | 3.3/3.8                   | 4.7/5.3   | 5.1/5.7     | N/A        | N/A    | N/A    | N/A      | N/A  | -1.6/-1.2 | N/A                |
| <b>Blood tests</b>                           |                           |           |             |            |        |        |          |      |           |                    |
| <b>Phosphate(mmol/L)</b>                     | 0.72                      | 0.53      | 0.40        | 0.65       | 1.11   | 1.12   | 1.41     | 1.53 | 0.82      | adults:0.81-       |

|                                   |       |       |       |        |       |       |       |       |       |                                           |
|-----------------------------------|-------|-------|-------|--------|-------|-------|-------|-------|-------|-------------------------------------------|
|                                   |       |       |       |        |       |       |       |       |       | 1.45;<br>0-12y:1.29-<br>2.26              |
| <b>Calcium (mmol/L)</b>           | 2.19  | 2.15  | 2.18  | 2.25   | 2.07  | 2.25  | 2.24  | 2.41  | 2.34  | adults:2.1-<br>2.7;<br>2-12y: 2.2-<br>2.7 |
| <b>Magnesium(mmol/L)</b>          | 0.78  | 0.85  | 0.90  | 0.80   | 0.87  | 0.97  | 0.89  | 0.83  | 0.98  | 0.67-1.04                                 |
| <b>B-ALP(ug/L)</b>                | >132  | >116  | 95.54 | 100.29 | 25.30 | 55.34 | 38.33 | >124  | 45.84 | 11.4-24.6                                 |
| <b>OCN</b>                        | 152.7 | N/A   | 51.8  | N/A    | N/A   | N/A   | N/A   | N/A   | N/A   | 24-70                                     |
| <b>PTH (pmol/L)</b>               | 9.91  | 12.77 | 8.23  | 10.34  | 7.65  | 8.45  | 13.3  | 5.16  | 6.08  | 1.6-6.9                                   |
| <b>25(OH)D<sub>3</sub>(ng/mL)</b> | 30.68 | 65.69 | 78.41 | 76.84  | 29.85 | 41.07 | 32.47 | 38.04 | 41.20 | 47.7-144                                  |
| <b>CTX(ng/mL)</b>                 | 2.67  | 0.942 | 0.825 | 0.632  | 0.60  | 1.13  | 0.903 | 1.52  | 0.269 | 0.30-0.584                                |

|                               |       |       |     |     |      |      |      |      |      |           |
|-------------------------------|-------|-------|-----|-----|------|------|------|------|------|-----------|
| <b>TSH (mU/L)</b>             | 2.53  | N/A   | N/A | N/A | N/A  | N/A  | N/A  | N/A  | N/A  | 0.27-4.2  |
| <b>FT4 (pmol/L)</b>           | 15.34 | N/A   | N/A | N/A | N/A  | N/A  | N/A  | N/A  | N/A  | 12.0-22.0 |
| <b>Plasma SOST (pg/mL)</b>    | N/A   | 2740  | N/A | N/A | 1854 | 667  | 672  | 767  | 706  | 714±199   |
| <b>Plasma OPG (pg/mL)</b>     | N/A   | 652   | N/A | N/A | 1200 | 695  | 421  | 379  | 387  | 377±102   |
| <b>Plasma RANKL(pg/mL)</b>    | N/A   | 102   | N/A | N/A | 129  | 119  | 155  | 142  | 127  | 152±94    |
| <b>RANKL/OPG ratio</b>        | N/A   | 0.15  | N/A | N/A | 0.11 | 0.17 | 0.37 | 0.38 | 0.33 | 0.31±0.11 |
| <b>Serum DKK1 (pg/mL)</b>     | N/A   | 5388  | N/A | N/A | 3193 | 3617 | 3995 | 3086 | 1341 | 3180±869  |
| <b>Urine tests</b>            |       |       |     |     |      |      |      |      |      |           |
| <b>Phosphate (mmol /24 h)</b> | 11.03 | 11.19 | N/A | N/A | N/A  | N/A  | N/A  | N/A  | N/A  | 22-48     |
| <b>Calcium (mmol /24 h)</b>   | 0.39  | 0.42  | N/A | N/A | N/A  | N/A  | N/A  | N/A  | N/A  | 2.5-7.5   |
| <b>Magnesium (mmol /24 h)</b> | 2.58  | 2.93  | N/A | N/A | N/A  | N/A  | N/A  | N/A  | N/A  | 3.0-5.0   |

|                         |     |      |      |      |      |       |      |      |       |         |
|-------------------------|-----|------|------|------|------|-------|------|------|-------|---------|
| <b>h)</b>               |     |      |      |      |      |       |      |      |       |         |
| <b>TRP (%)</b>          | N/A | 73   | 76   | 87   | 82   | 88    | 95   | 97   | 95    | 80-95   |
| <b>TmPO4/GFR(mg/dL)</b> | N/A | 1.34 | 1.19 | 1.37 | 2.22 | 3.06  | 4.19 | 4.64 | 2.41  | 2.2-4.2 |
| <b>FECa (%)</b>         | N/A | 0.71 | 1.01 | N/A  | 9.45 | 27.98 | 2.28 | 2.04 | 16.88 | N/A     |

182 Note: & caltrate plus vitamin D<sub>3</sub> were prescribed; \* Phosphorus supplement was prescribed.

## 183 **Mutational Analysis**

184 Whole exome sequencing (WES) of the proband was performed. A novel heterozygous  
185 missense mutation c.424G>T (p. G142X) was found in exon 1 of GNAS isoform XLas  
186 (NM\_080425.3). This changed the codon (GGA) for 142<sup>nd</sup> amino acid glycine (G) to a  
187 stop codon (UGA) (Fig.2A) and was predicted to be deleterious, leading to early  
188 termination of protein translation. This mutation was not found in OMIM, HGMD and  
189 Clinvar database, and was also not included in population databases, including 1000  
190 Genomes, dbSNP, Exome Variant Server and ExAC Browser. This mutation was also  
191 found in his father and daughter. His mother, brother and son were negative.

192 XLas, a long Gs $\alpha$  variant, uses an alternative first exon, which splices into exons 2–  
193 13 of Gs $\alpha$ . Alex (NM\_001309883.1) is also generated from an alternative reading frame  
194 of the XLas transcript[9], which has no similarity to other proteins encoded by this  
195 gene. This mutation locates in the first exon of XLas, which is also located in the coding  
196 region of Alex and generates a synonymous mutation c.237G>T (p. P79P) (Fig.2B).  
197 Gs $\alpha$ , NESP55 and A/B transcripts were predicted to be unaffected.

## 198 **Osteoclast(OC) formation and function**

199 Osteoclasts were induced from human peripheral blood mononuclear cells (PBMCs) to  
200 observe the ability of in vitro osteoclast formation and bone resorption. TRAP  
201 staining reveal decreased osteoclast numbers induced from the PBMCs of the patient  
202 (Fig.3G). However, scanning electron microscopy observation of the co-cultured  
203 bone slices showed normal osteoclast morphology and pit formation of the osteoclasts  
204 from the patient (Fig. 3C-F).

## 205 **Expression and location of Wild type (WT) and mutant XLas in SaOS2 cells**

206 WT and mutant XLas cDNA were transfected into human SaOS2 cells. In these  
207 transfected cells, EGFP-tagged WT XLas was localized to the cell membrane and

208 cytoplasm. On the contrary, the expression of EGFP-tagged mutant XLas was absent in  
209 transfected SaOS2 cells (Fig. 4). The mRNA expression of WT and mutant XLas was  
210 significantly higher in transfected cells than in cells transfected with empty vector  
211 (Fig.3H).

### 212 **cAMP production**

213 The ability of cAMP generation under PTH stimulation in transfected cells were  
214 determined. SaOS2 cells transfected with WT XLas showed higher cAMP production  
215 after PTH stimulation, while SaOS2 cells transfected with mutant XLas showed similar  
216 lower cAMP production as that in SaOS2 cells transfected with empty vector (Fig.3I).

### 217 **Discussion**

218 This is the first report of a mutation located in the first exon of XLas in humans, which  
219 was predicted to have no significant effects on other gene products of this locus. This  
220 novel mutation causes a new constellation of clinical features including high bone mass,  
221 unclosed cranial suture, fractures, hypophosphatemia, and elevated PTH levels. By  
222 contrary, the major clinical features of AHO, caused by heterozygous inactivating  
223 mutations in Gs $\alpha$ -coding GNAS exons, include obesity with round face, short stature,  
224 brachydactyly, subcutaneous ossification, and mental retardation [4]. In some cases,  
225 TSH, gonadotropins and GHRH resistance may be variably present [10]. Previously  
226 reported mutations often disrupt multiple protein-coding transcripts in addition to that  
227 encoding Gs $\alpha$  [11, 12], making it difficult to distinguish the contributions of each  
228 transcript to disease phenotypes. Therefore, this case is very rare and precious. Our  
229 study indicates XLas plays a key regulatory role in bone metabolism and may be  
230 involved in PTH/cAMP signaling pathway in physiological conditions.

231 Gs $\alpha$  is able to stimulate the production of the second messenger cAMP under PTH  
232 stimulation. However, the significance of XLas still remains largely unknown in



233 humans with conflicting results [6, 8, 13]. The abnormal skeletal phenotype in this  
234 patient implies that XLas has an important physiological role in humans. Our *in vitro*  
235 study clearly demonstrated that WT XLas was capable of stimulating cAMP production  
236 in human SaOS2 cells, which was blunted by G142X mutation. PTH shows both  
237 anabolic and catabolic actions on the skeleton, depending on the ways in which PTH is  
238 administrated [14]. Through targeting cAMP/PKA pathways, PTH favors bone  
239 resorption by stimulating RANKL while inhibiting OPG expression in  
240 osteoblasts/osteocytes via the PTH1R, rendering increased RANKL/OPG ratio [15-17].  
241 Also through cAMP/PKA signaling pathway, PTH induces bone formation, at least in  
242 part, by its ability to downregulate SOST and DKK1 expression in osteocytes [14, 18-  
243 21]. This proband showed increased circulating levels of SOST, DKK1 and OPG, while  
244 decreased RANKL levels and reduced RANKL/OPG ratio, concurrently with the  
245 elevated PTH levels, indicating impaired skeletal response, at least partly, to PTH as a  
246 result of lower cAMP production induced by G142X mutation (Figure 5). Our study  
247 suggested that XLas may exert similar regulatory effects as Gs $\alpha$  regarding the  
248 expression of target genes as well as cAMP production. There is another possibility that  
249 the observed phenotype may be primarily resulted from XLas deficiency in bone but  
250 not from the action of PTH. However, based on our *in vivo* and *in vitro* studies,  
251 especially the changes of circulating SOST, DKK1, RANKL and OPG levels, it is more  
252 likely to be secondary to the impaired PTH/cAMP pathway in the skeletal tissue.

253 Although SOST, DKK1, RANKL and OPG have not been established as the clinical  
254 bone markers in humans, previous studies have suggested that disorders of parathyroid  
255 influence the circulating levels of these factors. Serum SOST levels are decreased in  
256 primary hyperparathyroidism and increased in hypoparathyroidism [22, 23], while  
257 serum DKK1 levels are increased in hyperparathyroidism [24]. Elevated RANKL/OPG

258 ratio has also been found in subjects with hyperparathyroidism [25, 26]. However, no  
259 related studies have been reported in subjects with PHP. Except for serum DKK1 levels,  
260 the elevated plasma SOST levels and reduced RANKL/OPG ratio may indicate  
261 decreased parathyroid function in proband and his father.

262 This patient showed a progressive increase in BMD, and the underlying mechanism  
263 was speculated to be due to impaired bone resorption. First, *in vitro* study found  
264 decreased osteoclast numbers induced from the PBMCs of this patient. Second,  
265 circulating levels of RANKL and the RANKL/OPG ratio were significantly reduced in  
266 patient, which may lead to lower osteoclast formation. Furthermore, osteopetrosis cases  
267 due to impaired bone resorption tend to have increased fracture risks, while  
268 sclerosteosis cases secondary to enhanced bone formation do not [27]. This patient  
269 showed bilateral femoral neck fractures, further confirming the impaired bone  
270 resorption as a result of reduced osteoclast formation may be the main cause of HBM.

271 The most perplexing thing about this patient is his bone turnover status. There are  
272 some contradictions in his clinical manifestations, bone metabolism index and the  
273 circulating levels of SOST, DKK1, RANKL and OPG. Bone biopsy remains the gold  
274 standard to assess the true bone metabolism status. However, bone biopsy was not  
275 performed due to the poor bone quality of this patient. It is well known that primary  
276 hyperparathyroidism causes increased bone turnover and reduced BMD, especially at  
277 the cortical bone [28]. On the contrary, idiopathic hypoparathyroidism (IHP) cases  
278 often have reduced bone turnover and increased BMD than the general population [29,  
279 30]. Compared with IHP and nonsurgical hypoparathyroidism (Ns-HypoPT) patients,  
280 PHP subjects, especially PHP type 1B, tend to have lower BMD, indicating incomplete  
281 skeletal resistance to PTH may exist [31-33]. However, when compared with normal

282 controls, patients with PHP1a showed a significantly greater total body BMD [34].  
283 Furthermore, striking osteosclerosis has been found in two brothers diagnosed with  
284 PHP1b [35]. *Gsa* in skeleton is biallelically expressed. Therefore, no matter the origin  
285 of mutation is, *GNAS* mutation may lead to decreased skeletal response to PTH [36,  
286 37]. It is reasonable to infer that bone turnover and bone metabolism status in PHP are  
287 closer to hypoparathyroidism than to hyperparathyroidism. However, the levels of bone  
288 metabolism indicators were significantly high in this patient. In other two studies, the  
289 levels of bone turnover markers were also high in subjects with PHP [31, 33]. It is  
290 notable that the proband's bone indicators, including B-ALP, OCN and CTX, showed  
291 a tendency to decrease during the past 4 years, despite the progressive increase in BMD.  
292 His persistent hypophosphatemia may play a role in the elevated B-ALP levels.

293 Our *in vitro* study clearly showed reduced osteoclast formation ability in this patient,  
294 which is consistent with the reduced RANKL/OPG ratio. Based on our experience, *in*  
295 *vitro* osteoclast culture could reliably reflect the osteoclast formation ability of humans  
296 [38]. Although this patient had increased CTX levels, we believe he had inhibited bone  
297 resorption as a result of decreased osteoclast formation, which is also consistent with  
298 osteopetrosis. As for bone formation, this patient had increased levels of SOST and  
299 DKK1, both of which could inhibit Wnt-mediated bone formation [27]. Furthermore,  
300 bone formation is coupled to bone resorption in general. Therefore, it is reasonable to infer  
301 that both bone resorption and bone formation were inhibited in this patient. The main  
302 physiological function of PTH is to promote bone resorption [5]. The impaired skeletal  
303 response to PTH may result in more inhibition on bone resorption than on bone  
304 formation, leading to increased bone mass (Figure 5). Therefore, we believe this patient  
305 belongs to a type of HBM with low bone turnover, primarily resulting from impaired  
306 bone resorption. Our study also suggests that exogenous RANKL may alleviate the

307 progressive increase in bone mass in this patient.

308         In the classic form of PHP, the PTH resistance is confined to the renal proximal  
309 tubule, leading to hypocalcemia, hyperphosphatemia, and elevated levels of PTH levels  
310 [39]. In fact, PTH resistance can occur either in the renal tubular level or the skeleton  
311 [39]. Given that the proband showed elevated serum PTH concurrently with increased  
312 phosphate excretion, it appears that PTH resistance is not present in the proximal tubule.  
313 In addition, urinary calcium excretion was extremely low, consistent with elevated PTH  
314 and a lack of resistance in distal nephron. In renal proximal tubules, *Gsa* is expressed  
315 only from the maternal allele, which may also apply to XLas based on patient-specific  
316 clinical data. Therefore, in this proband, the renal tubular response to PTH may be  
317 normal. We speculated the paternally inherited mutation located in XLas impaired  
318 skeletal response to PTH, leading to reduced serum calcium and elevated PTH level.  
319 The persistently elevated PTH caused hypophosphatemia. As a compensation, his  
320 serum calcium levels were maintained at the lower limit of the normal range.

321         It is notable that the patient showed unclosed coronal suture and sagittal suture.  
322 Unclosed cranial suture has also been reported in patients carrying mutations in  
323 runt-related transcription factor 2 (*Runx2*), which is known to affect metopic suture  
324 fusion and plays a key role in osteoblast differentiation mediated by Wnt-signaling  
325 pathway [40]. *Runx2* mutations have been described in subjects with cleidocranial  
326 dysplasia (CCD) (MIM 119600), which is a rare hereditary skeletal disorder [40, 41].  
327 WES has excluded *Runx2* mutation in this patient. However, our study found increased  
328 circulating levels of *SOST* and *DKK1* in this patient, both of which could inhibit Wnt-  
329 pathway mediated bone formation. *Runx2* is one of the major target genes of activated  
330 Wnt-pathway [42], and the inhibited Wnt-signaling pathway may lead to reduced  
331 *Runx2* expression. Therefore, it is reasonable to speculate that the unclosed cranial

332 suture may be secondary to the impaired Wnt signaling and the resultant inhibited  
333 Runx2 expression (Figure 5).

334 His father also carried this mutation and the origin of mutant allele was unknown.  
335 It seemed that his father manifested a similar but milder phenotype. His daughter also  
336 carried the same mutation and presently showed no similar symptoms, possibly due to  
337 her young age or incomplete penetrance. It is suggested that XLas may be essential for  
338 normal fetal growth and development, and paternal mutations in XLas may lead to  
339 severe intrauterine growth retardation [11]. The birth records of this patient and his  
340 father were unknown. The daughter was born at term with a birth weight of about 2.6  
341 kg and was well after birth. This family will be regularly followed up.

342 In conclusion, we first report a novel mutation located in the first exon of XLas in  
343 a patient with HBM, unclosed cranial suture, hypophosphatemia, and elevated PTH,  
344 indicating there is still a lot of ignorance about the physiopathologic roles of alternative  
345 GNAS gene products. The identification of cases with novel genetic and epigenetic  
346 defects indicates the urgent need for a new classification of this spectrum of diseases  
347 [5]. Our findings further expand the spectrum of clinical manifestation of diseases due  
348 to GNAS mutations, and also urge further investigation to explore the regulatory role of  
349 XLas in bone metabolism. Our study indicates that GNAS locus should be considered  
350 as a candidate gene for HBM.

351

### 352 **Acknowledgments**

353 This work was supported by grants from the National Natural Science Foundation of  
354 China (No. 81770875, 81572639, 81370969 to Xijie Yu) and the Science & Technology  
355 Department of Sichuan Province ( 2018SZ0142 to Xijie Yu ) . This study was also

356 supported by the National Natural Science Foundation of China (grant no. 81702156 to  
357 Y Meng), Postdoctoral Science Foundation of China (grant no. 2017M61060 to Y  
358 Meng) and Postdoctoral Research Foundation of Sichuan University (grant no.  
359 2017SCU12038 to Y Meng). The authors thank Miss Xiao Yu from the University of  
360 Michigan, for her help with editing the language.

361

362 **Authors' roles:** Study design: Xiang Chen and Xijie Yu. Study conduct: Xiang Chen,  
363 Ying Xie, Shan Wan, Li Li, Jie Zhang and Bo Su. Data collection: Xiang Chen and  
364 Yang Meng. Data analysis: Xiang Chen. Data interpretation: Xiang Chen and Xijie Yu.  
365 Drafting manuscript: Xiang Chen. Revising manuscript content: Xijie Yu. Approving  
366 final version of manuscript: Xiang Chen and Xijie Yu. Xiang Chen and Xijie Yu take  
367 responsibility for the integrity of the data analysis.

## 369 REFERENCES

- 370 1. Nakamura A, Hamaguchi E, Horikawa R, Nishimura Y, Matsubara K, Sano S, et al.  
371 Complex Genomic Rearrangement Within the GNAS Region Associated With Familial  
372 Pseudohypoparathyroidism Type 1b. *J Clin Endocrinol Metab.* 2016;101(7):2623-2627. Epub  
373 2016/06/03. doi: 10.1210/jc.2016-1725. PubMed PMID: 27253667.
- 374 2. de Nanclares GP, Fernandez-Rebollo E, Santin I, Garcia-Cuartero B, Gaztambide S,  
375 Menendez E, et al. Epigenetic defects of GNAS in patients with pseudohypoparathyroidism  
376 and mild features of Albright's hereditary osteodystrophy. *J Clin Endocrinol Metab.*  
377 2007;92(6):2370-2373. Epub 2007/04/05. doi: 10.1210/jc.2006-2287. PubMed PMID:  
378 17405843.
- 379 3. Lecumberri B, Fernandez-Rebollo E, Sentchordi L, Saavedra P, Bernal-Chico A, Pallardo  
380 LF, et al. Coexistence of two different pseudohypoparathyroidism subtypes (1a and 1b) in the  
381 same kindred with independent Gs{alpha} coding mutations and GNAS imprinting defects. *J*  
382 *Med Genet.* 2010;47(4):276-280. Epub 2009/10/28. doi: 10.1136/jmg.2009.071001. PubMed  
383 PMID: 19858129; PubMed Central PMCID: PMC3030964.
- 384 4. Turan S, Bastepe M. GNAS Spectrum of Disorders. *Curr Osteoporos Rep.*  
385 2015;13(3):146-158. doi: 10.1007/s11914-015-0268-x. PubMed PMID: 25851935; PubMed  
386 Central PMCID: PMC4417430.
- 387 5. Mantovani G, Spada A, Elli FM. Pseudohypoparathyroidism and Gsalpha-cAMP-linked  
388 disorders: current view and open issues. *Nat Rev Endocrinol.* 2016;12(6):347-356. doi:  
389 10.1038/nrendo.2016.52. PubMed PMID: 27109785.
- 390 6. Liu Z, Turan S, Wehbi VL, Vilardaga JP, Bastepe M. Extra-long Galphas variant  
391 XLalphas protein escapes activation-induced subcellular redistribution and is able to provide  
392 sustained signaling. *J Biol Chem.* 2011;286(44):38558-38569. Epub 2011/09/06. doi:  
393 10.1074/jbc.M111.240150. PubMed PMID: 21890629; PubMed Central PMCID:  
394 PMC3207409.
- 395 7. Aydin C, Aytan N, Mahon MJ, Tawfeek HA, Kowall NW, Dedeoglu A, et al. Extralarge  
396 XL(alpha)s (XXL(alpha)s), a variant of stimulatory G protein alpha-subunit (Gs(alpha)), is a  
397 distinct, membrane-anchored GNAS product that can mimic Gs(alpha). *Endocrinology.*  
398 2009;150(8):3567-3575. doi: 10.1210/en.2009-0318. PubMed PMID: 19423757; PubMed  
399 Central PMCID: PMC2717877.
- 400 8. Chen M, Gavrilova O, Liu J, Xie T, Deng C, Nguyen AT, et al. Alternative Gnas gene  
401 products have opposite effects on glucose and lipid metabolism. *Proc Natl Acad Sci U S A.*  
402 2005;102(20):7386-7391. Epub 2005/05/11. doi: 10.1073/pnas.0408268102. PubMed PMID:  
403 15883378; PubMed Central PMCID: PMC1129092.
- 404 9. Eaton SA, Williamson CM, Ball ST, Beechey CV, Moir L, Edwards J, et al. New  
405 mutations at the imprinted Gnas cluster show gene dosage effects of Gsalpha in postnatal  
406 growth and implicate XLalphas in bone and fat metabolism but not in suckling. *Mol Cell Biol.*

- 407 2012;32(5):1017-1029. Epub 2012/01/05. doi: 10.1128/MCB.06174-11. PubMed PMID:  
408 22215617; PubMed Central PMCID: PMCPMC3295192.
- 409 10. Giovanna M, Francesca Marta E. Multiple hormone resistance and alterations of G-  
410 protein-coupled receptors signaling. *Best Pract Res Clin Endocrinol Metab.* 2018;32(2):141-  
411 154. doi: 10.1016/j.beem.2018.01.002. PubMed PMID: 29678282.
- 412 11. Richard N, Molin A, Coudray N, Rault-Guillaume P, Juppner H, Kottler ML. Paternal  
413 GNAS mutations lead to severe intrauterine growth retardation (IUGR) and provide evidence  
414 for a role of XLalphas in fetal development. *J Clin Endocrinol Metab.* 2013;98(9):E1549-1556.  
415 Epub 2013/07/26. doi: 10.1210/jc.2013-1667. PubMed PMID: 23884777; PubMed Central  
416 PMCID: PMCPMC3763972.
- 417 12. Plagge A, Gordon E, Dean W, Boiani R, Cinti S, Peters J, et al. The imprinted signaling  
418 protein XL alpha s is required for postnatal adaptation to feeding. *Nat Genet.* 2004;36(8):818-  
419 826. Epub 2004/07/27. doi: 10.1038/ng1397. PubMed PMID: 15273686.
- 420 13. Bastepe M, Gunes Y, Perez-Villamil B, Hunzelman J, Weinstein LS, Juppner H.  
421 Receptor-mediated adenylyl cyclase activation through XLalpha(s), the extra-large variant of  
422 the stimulatory G protein alpha-subunit. *Mol Endocrinol.* 2002;16(8):1912-1919. doi:  
423 10.1210/me.2002-0054. PubMed PMID: 12145344.
- 424 14. Silva BC, Bilezikian JP. Parathyroid hormone: anabolic and catabolic actions on the  
425 skeleton. *Curr Opin Pharmacol.* 2015;22:41-50. Epub 2015/04/10. doi:  
426 10.1016/j.coph.2015.03.005. PubMed PMID: 25854704; PubMed Central PMCID:  
427 PMCPMC5407089.
- 428 15. Kondo H, Guo J, Bringham FR. Cyclic adenosine monophosphate/protein kinase A  
429 mediates parathyroid hormone/parathyroid hormone-related protein receptor regulation of  
430 osteoclastogenesis and expression of RANKL and osteoprotegerin mRNAs by marrow  
431 stromal cells. *J Bone Miner Res.* 2002;17(9):1667-1679. Epub 2002/09/05. doi:  
432 10.1359/jbmr.2002.17.9.1667. PubMed PMID: 12211438.
- 433 16. Fu Q, Manolagas SC, O'Brien CA. Parathyroid hormone controls receptor activator of  
434 NF-kappaB ligand gene expression via a distant transcriptional enhancer. *Mol Cell Biol.*  
435 2006;26(17):6453-6468. Epub 2006/08/18. doi: 10.1128/MCB.00356-06. PubMed PMID:  
436 16914731; PubMed Central PMCID: PMCPMC1592840.
- 437 17. Ben-awadh AN, Delgado-Calle J, Tu X, Kuhlenschmidt K, Allen MR, Plotkin LI, et al.  
438 Parathyroid hormone receptor signaling induces bone resorption in the adult skeleton by  
439 directly regulating the RANKL gene in osteocytes. *Endocrinology.* 2014;155(8):2797-2809.  
440 Epub 2014/06/01. doi: 10.1210/en.2014-1046. PubMed PMID: 24877630; PubMed Central  
441 PMCID: PMCPMC4098003.
- 442 18. Kramer I, Keller H, Leupin O, Kneissel M. Does osteocytic SOST suppression mediate  
443 PTH bone anabolism? *Trends Endocrinol Metab.* 2010;21(4):237-244. Epub 2010/01/16. doi:  
444 10.1016/j.tem.2009.12.002. PubMed PMID: 20074973.
- 445 19. Keller H, Kneissel M. SOST is a target gene for PTH in bone. *Bone.* 2005;37(2):148-158.



- 446 Epub 2005/06/11. doi: 10.1016/j.bone.2005.03.018. PubMed PMID: 15946907.
- 447 20. Silva BC, Costa AG, Cusano NE, Kousteni S, Bilezikian JP. Catabolic and anabolic  
448 actions of parathyroid hormone on the skeleton. *J Endocrinol Invest.* 2011;34(10):801-810.  
449 Epub 2011/09/29. doi: 10.3275/7925. PubMed PMID: 21946081; PubMed Central PMCID:  
450 PMCPMC4315330.
- 451 21. Li JY, Walker LD, Tyagi AM, Adams J, Weitzmann MN, Pacifici R. The sclerostin-  
452 independent bone anabolic activity of intermittent PTH treatment is mediated by T-cell-  
453 produced Wnt10b. *J Bone Miner Res.* 2014;29(1):43-54. Epub 2013/12/21. doi:  
454 10.1002/jbmr.2044. PubMed PMID: 24357520; PubMed Central PMCID: PMCPMC4326235.
- 455 22. Ardawi MS, Al-Sibiany AM, Bakhsh TM, Rouzi AA, Qari MH. Decreased serum sclerostin  
456 levels in patients with primary hyperparathyroidism: a cross-sectional and a longitudinal study.  
457 *Osteoporos Int.* 2012;23(6):1789-1797. doi: 10.1007/s00198-011-1806-8. PubMed PMID:  
458 22041864.
- 459 23. Costa AG, Cremers S, Rubin MR, McMahon DJ, Sliney J, Jr., Lazaretti-Castro M, et al.  
460 Circulating sclerostin in disorders of parathyroid gland function. *J Clin Endocrinol Metab.*  
461 2011;96(12):3804-3810. doi: 10.1210/jc.2011-0566. PubMed PMID: 21937621; PubMed  
462 Central PMCID: PMCPMC3232608.
- 463 24. Viapiana O, Fracassi E, Troplini S, Idolazzi L, Rossini M, Adami S, et al. Sclerostin and  
464 DKK1 in primary hyperparathyroidism. *Calcif Tissue Int.* 2013;92(4):324-329. doi:  
465 10.1007/s00223-012-9665-7. PubMed PMID: 23430197.
- 466 25. Nakchbandi IA, Lang R, Kinder B, Insogna KL. The role of the receptor activator of  
467 nuclear factor-kappaB ligand/osteoprotegerin cytokine system in primary  
468 hyperparathyroidism. *J Clin Endocrinol Metab.* 2008;93(3):967-973. doi: 10.1210/jc.2007-  
469 1645. PubMed PMID: 18073309; PubMed Central PMCID: PMCPMC2266956.
- 470 26. Szymczak J, Bohdanowicz-Pawlak A. Osteoprotegerin, RANKL, and bone turnover in  
471 primary hyperparathyroidism: the effect of parathyroidectomy and treatment with alendronate.  
472 *Horm Metab Res.* 2013;45(10):759-764. doi: 10.1055/s-0033-1349842. PubMed PMID:  
473 23888411.
- 474 27. Chen X, Yu H, Yu X. A Review of the Clinical, Radiological and Biochemical  
475 Characteristics and Genetic Causes of High Bone Mass Disorders. *Curr Drug Targets.*  
476 2018;19(6):621-635. Epub 2018/01/24. doi: 10.2174/1389450119666180122161503. PubMed  
477 PMID: 29359663.
- 478 28. Eller-Vainicher C, Filopanti M, Palmieri S, Ulivieri FM, Morelli V, Zhukouskaya VV, et al.  
479 Bone quality, as measured by trabecular bone score, in patients with primary  
480 hyperparathyroidism. *Eur J Endocrinol.* 2013;169(2):155-162. doi: 10.1530/EJE-13-0305.  
481 PubMed PMID: 23682095.
- 482 29. Chawla H, Saha S, Kandasamy D, Sharma R, Sreenivas V, Goswami R. Vertebral  
483 Fractures and Bone Mineral Density in Patients With Idiopathic Hypoparathyroidism on Long-  
484 Term Follow-Up. *J Clin Endocrinol Metab.* 2017;102(1):251-258. Epub 2016/11/05. doi:

- 485 10.1210/jc.2016-3292. PubMed PMID: 27813708.
- 486 30. Silva BC, Rubin MR, Cusano NE, Bilezikian JP. Bone imaging in hypoparathyroidism.  
487 Osteoporos Int. 2017;28(2):463-471. doi: 10.1007/s00198-016-3750-0. PubMed PMID:  
488 27577725.
- 489 31. Underbjerg L, Malmstroem S, Sikjaer T, Rejnmark L. Bone Status Among Patients With  
490 Nonsurgical Hypoparathyroidism, Autosomal Dominant Hypocalcaemia, and  
491 Pseudohypoparathyroidism: A Cohort Study. J Bone Miner Res. 2018;33(3):467-477. Epub  
492 2017/11/01. doi: 10.1002/jbmr.3328. PubMed PMID: 29087612.
- 493 32. Chu X, Zhu Y, Wang O, Nie M, Quan T, Xue Y, et al. Bone Mineral Density and Its Serial  
494 Changes Are Associated With PTH Levels in Pseudohypoparathyroidism Type 1B Patients. J  
495 Bone Miner Res. 2018;33(4):743-752. doi: 10.1002/jbmr.3360. PubMed PMID: 29240265.
- 496 33. Kanatani M, Sugimoto T, Kaji H, Ikeda K, Chihara K. Skeletal responsiveness to  
497 parathyroid hormone in pseudohypoparathyroidism. Eur J Endocrinol. 2001;144(3):263-269.  
498 Epub 2001/03/15. PubMed PMID: 11248746.
- 499 34. Long DN, Levine MA, Germain-Lee EL. Bone mineral density in  
500 pseudohypoparathyroidism type 1a. J Clin Endocrinol Metab. 2010;95(9):4465-4475. doi:  
501 10.1210/jc.2010-0498. PubMed PMID: 20610593; PubMed Central PMCID:  
502 PMCPMC2936057.
- 503 35. Sbrocchi AM, Rauch F, Lawson ML, Hadjiyannakis S, Lawrence S, Bastepe M, et al.  
504 Osteosclerosis in two brothers with autosomal dominant pseudohypoparathyroidism type 1b:  
505 bone histomorphometric analysis. Eur J Endocrinol. 2011;164(2):295-301. doi: 10.1530/EJE-  
506 10-0795. PubMed PMID: 21062889; PubMed Central PMCID: PMCPMC3810006.
- 507 36. Nusynowitz ML, Frame B, Kolb FO. The spectrum of the hypoparathyroid states: A  
508 classification based on physiologic principles. Medicine (Baltimore). 1976;55(2):105-119.  
509 PubMed PMID: 768709.
- 510 37. Levine MA. An update on the clinical and molecular characteristics of  
511 pseudohypoparathyroidism. Curr Opin Endocrinol Diabetes Obes. 2012;19(6):443-451. doi:  
512 10.1097/MED.0b013e32835a255c. PubMed PMID: 23076042; PubMed Central PMCID:  
513 PMCPMC3679535.
- 514 38. Chen X, Zhang K, Hock J, Wang C, Yu X. Enhanced but hypofunctional  
515 osteoclastogenesis in an autosomal dominant osteopetrosis type II case carrying a  
516 c.1856C>T mutation in CLCN7. Bone Res. 2016;4:16035. Epub 2016/12/19. doi:  
517 10.1038/boneres.2016.35. PubMed PMID: 27990310; PubMed Central PMCID:  
518 PMCPMC5126728.
- 519 39. Burnstein MI, Kottamasu SR, Pettifor JM, Sochett E, Ellis BI, Frame B. Metabolic bone  
520 disease in pseudohypoparathyroidism: radiologic features. Radiology. 1985;155(2):351-356.  
521 Epub 1985/05/01. doi: 10.1148/radiology.155.2.3983385. PubMed PMID: 3983385.
- 522 40. Jaruga A, Hordyjewska E, Kandzierski G, Tylzanowski P. Cleidocranial dysplasia and  
523 RUNX2-clinical phenotype-genotype correlation. Clin Genet. 2016;90(5):393-402. doi:

524 10.1111/cge.12812. PubMed PMID: 27272193.  
525 41. Karaguzel G, Akturk FA, Okur E, Gumele HR, Gedik Y, Okten A. Cleidocranial dysplasia:  
526 a case report. J Clin Res Pediatr Endocrinol. 2010;2(3):134-136. doi: 10.4274/jcrpe.v2i3.134.  
527 PubMed PMID: 21274329; PubMed Central PMCID: PMC3005677.  
528 42. D'Alimonte I, Lannutti A, Pipino C, Di Tomo P, Pierdomenico L, Cianci E, et al. Wnt  
529 signaling behaves as a "master regulator" in the osteogenic and adipogenic commitment of  
530 human amniotic fluid mesenchymal stem cells. Stem Cell Rev. 2013;9(5):642-654. doi:  
531 10.1007/s12015-013-9436-5. PubMed PMID: 23605563; PubMed Central PMCID:  
532 PMCPMC3785124.  
533  
534

535 **Figure legends**

536 **Figure 1.** Radiographic features of this patient. (A). X-ray of skull showed unclosed  
537 coronal suture and sagittal suture (arrow). (B). Vertebral body showed diffuse increase  
538 in bone density. (C). Bilateral femoral neck fractures (arrow) and uneven density of  
539 pelvis. (D). Increased bone mineral density in femoral cortex.

540 **Figure 2.** Genetic analysis of GNAS mutation. (A). A missense mutation c.424G>T (p.  
541 G142X) in XLas was found in proband, his father and daughter. (B). This mutation  
542 exclusively affects XLas , but not Gs $\alpha$ .

543 **Figure 3.** *In vitro* osteoclast culture and expression of mutant or WT XLas in SaOS2  
544 Cells. (A-B). TRAP staining of osteoclasts. (C-D). Adherent cells on the bone slices.  
545 (E-F) Pit formation after ultrasonic removal of the adherent cells. (G). The number of  
546 osteoclasts in the patient culture was significantly lower than that in the control culture.  
547 \*\*p<0.01, compared with control. (H). The mRNA expression of WT and mutant XLas  
548 was significantly increased in the transfected SaOS2 cells. \*\*p<0.01, compared with  
549 vector; ## p<0.01, compared with WT. (I). The production of cAMP induced by PTH in  
550 SaOS2 cells transfected with WT XLas was significantly higher than that in the empty  
551 vector group, which was blunted in G142X mutation. \*\*p<0.01, compared with vector;  
552 ## p<0.01, compared with WT.

553 **Figure 4.** (A-C). SaOS2 cells transfected with empty vector. (D-F). SaOS2 cells  
554 transfected with WT XLas. EGFP-tagged WT XLas was localized to the plasma  
555 membrane and cytoplasm. (G-I). SaOS2 cells transfected with mutant XLas.

556 **Figure 5.** XLas mutation leads to selective skeletal resistance but normal renal tubular  
557 response to PTH.

558

559 Fig 1. Tif

560

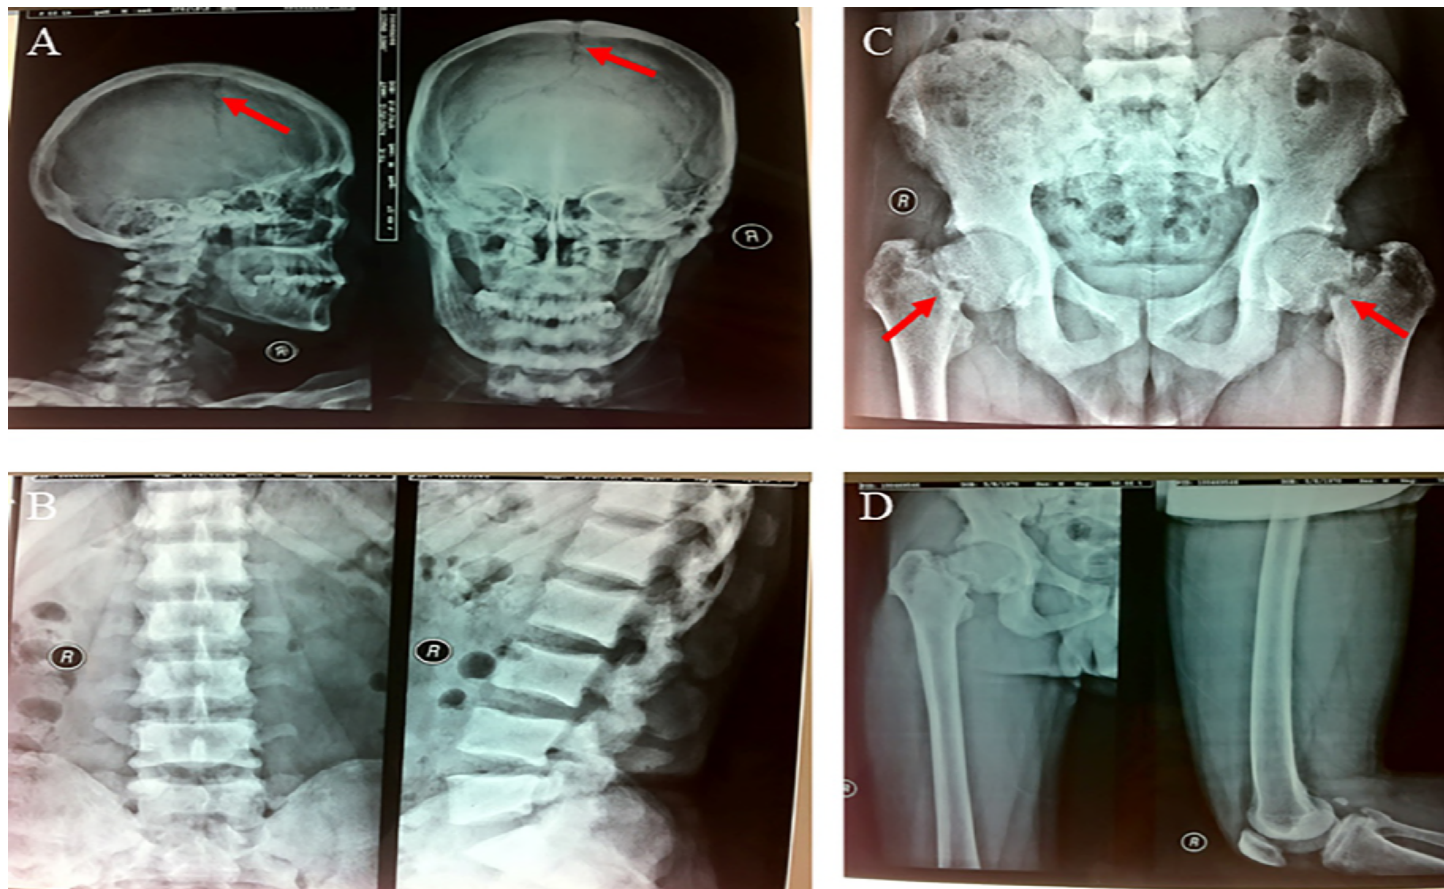

561 Fig 2. tif  
562

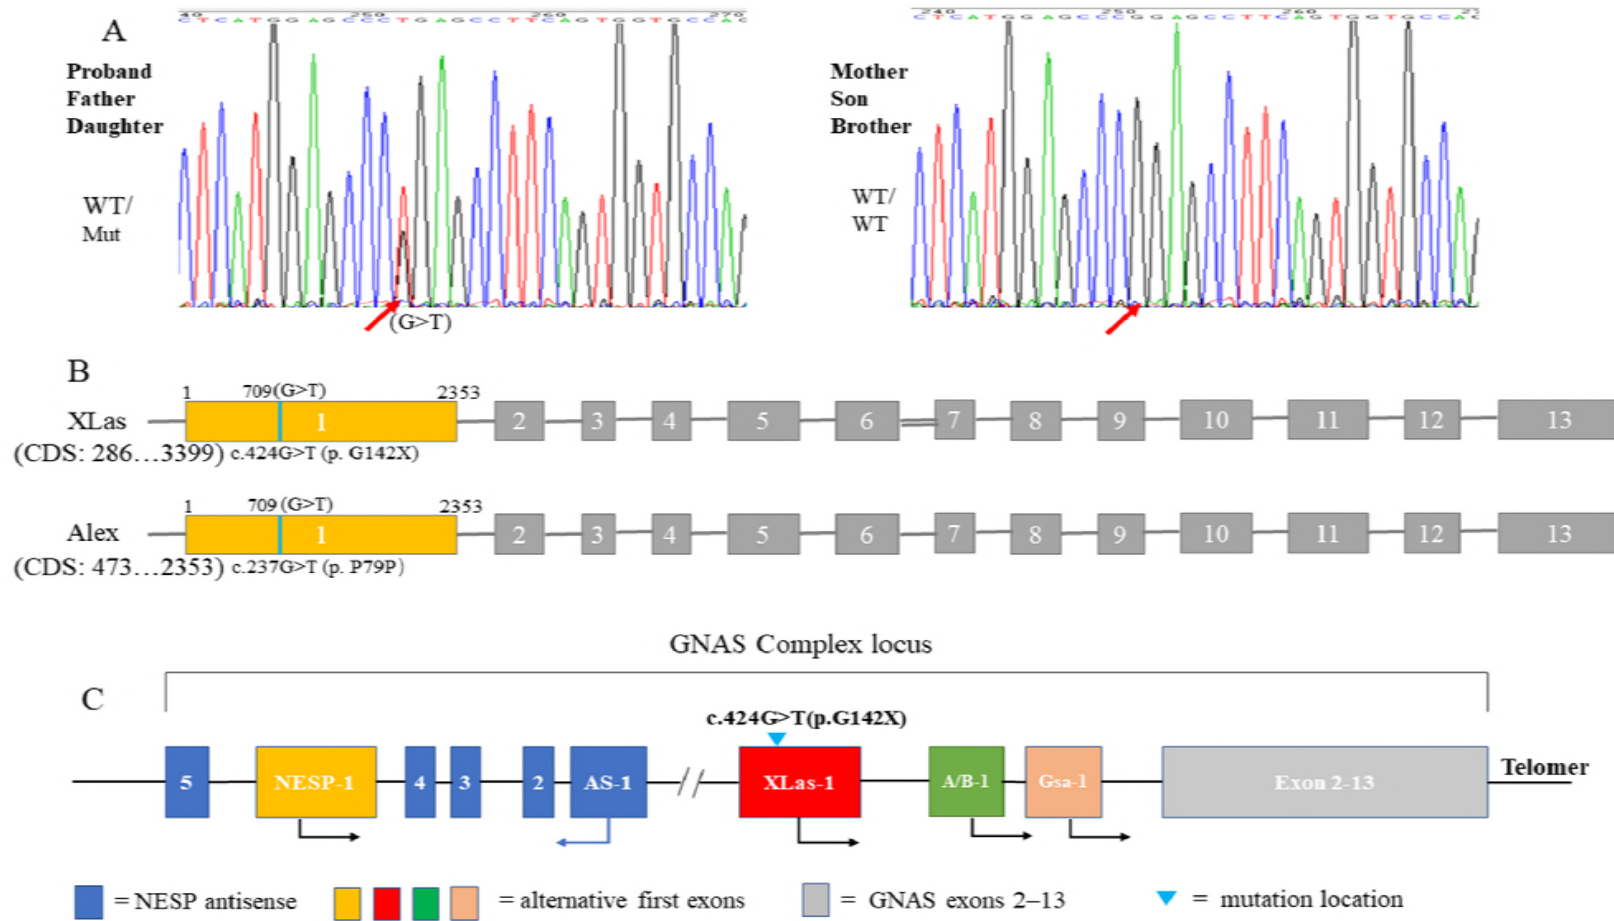

563 Fig 3. tif  
564  
565

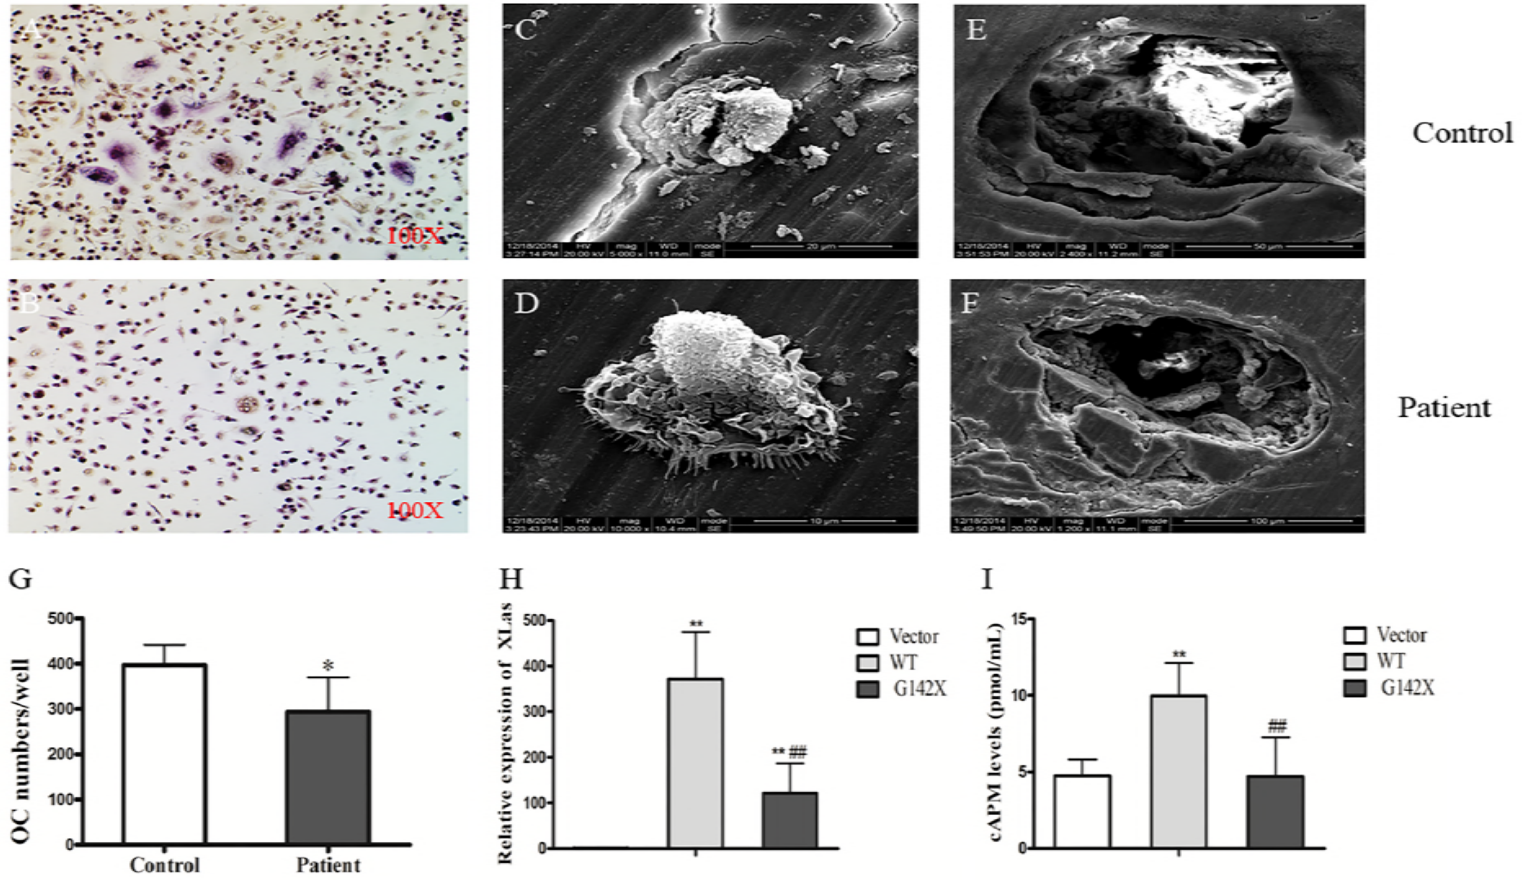

566 Fig 4. tif  
567

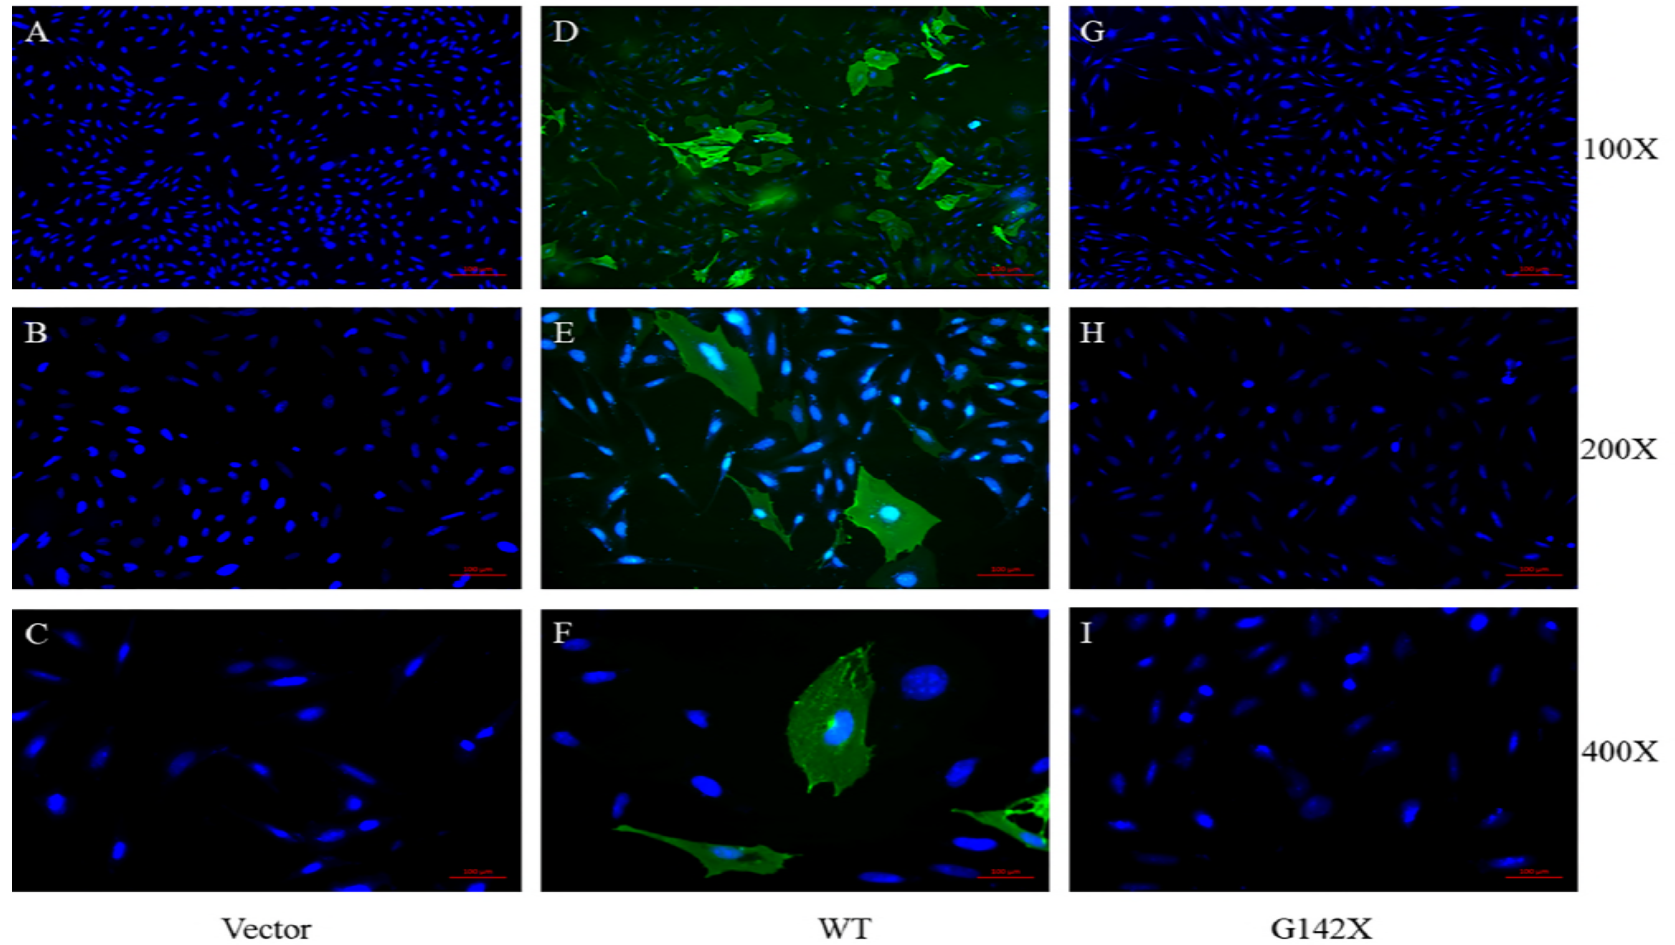



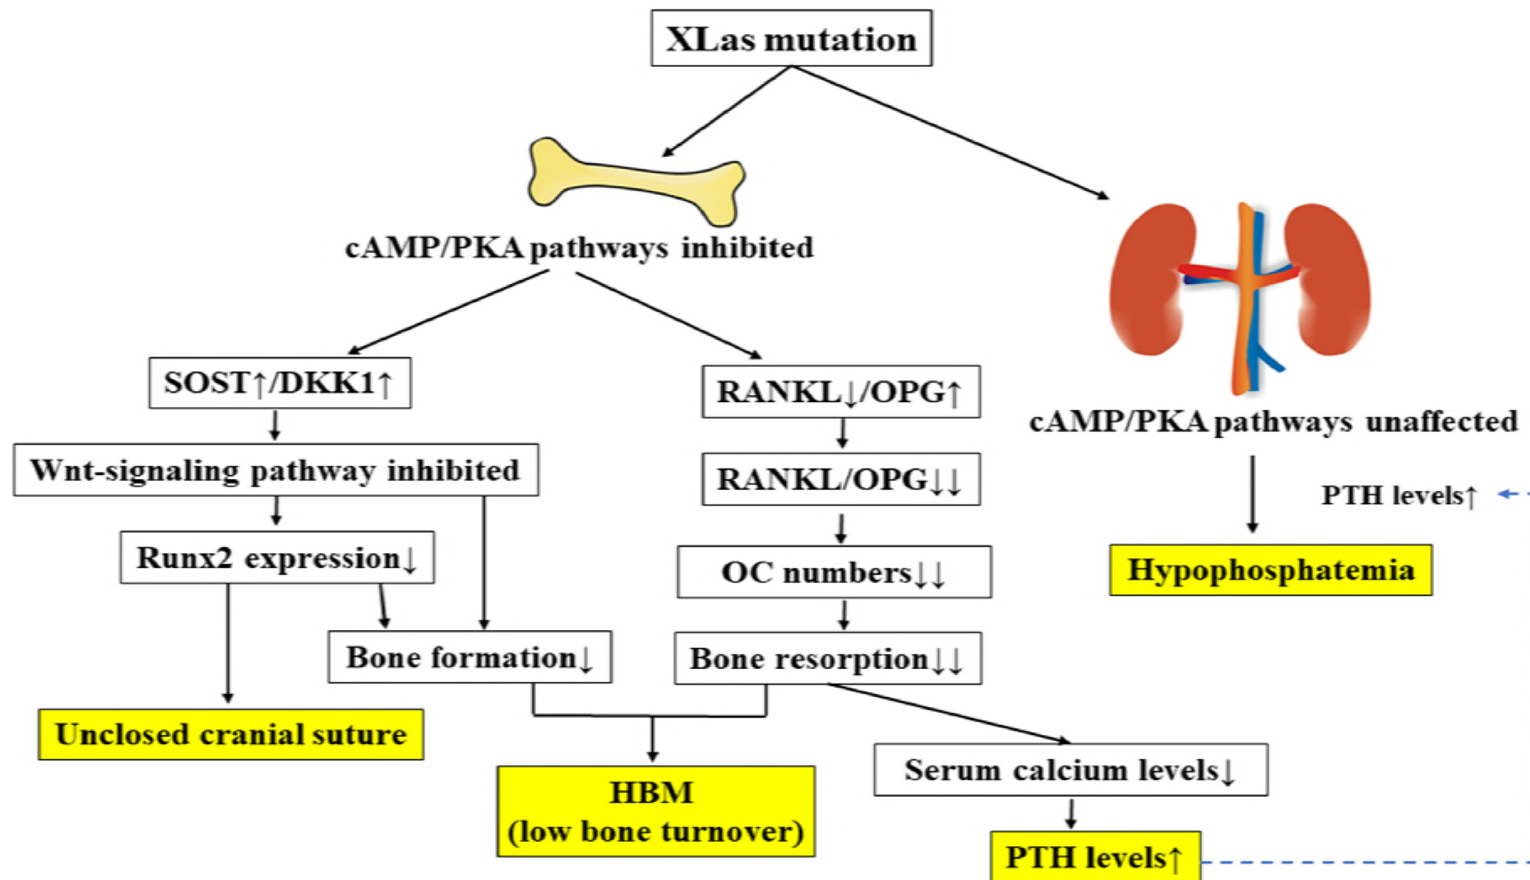

Source: https://www.biorxiv.org/content/10.1101/507111v1.full.pdf
